# Supplementary material for: Plasma Based Water Purifier: Design And Testing of&nbsp;Prototype with Different Samples of Water
Source: Preprints.org preprint supplement (doi:10.20944/preprints201809.0070.v1), 2018-09-04
Supplement: Supplementary file 2 [file supplementary]

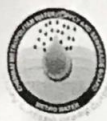

CHENNAI METROPOLITAN WATER SUPPLY AND SEWERAGE BOARD  
QUALITY ASSURANCE WING, WATER ANALYSIS LABORATORY  
NEW AVADI ROAD, CHENNAI - 600 010.

STUDY PURPOSE

- 1 Challan No. 823 Rs.525/- Date: 16.02.17  
2 Date of Collection 16.02.17  
3 Date of Receipt 16.02.17  
4 Source as per Lable Normal Water (befour treatment)  
5 Sample collected by Anand Institute of Higher Technology Kazhipattur, Chennai  
603 103

6 RESULTS OF PHYSICAL AND CHEMICAL EXAMINATION

|                                                                    |                    | IS:10500-2012<br>ACCEPTABLE<br>LIMIT | IS:10500-2012<br>PERMISSIBLE<br>LIMIT |
|--------------------------------------------------------------------|--------------------|--------------------------------------|---------------------------------------|
| (i) Colour                                                         | Colourless & Clear |                                      |                                       |
| (ii) Odour                                                         | Nil                | Agreeable                            | Agreeable                             |
| (iii) Turbidity (N.T.U)                                            | 0.1                | 1                                    | 10                                    |
| (iv) Total Dissolved Solids at 105 °C (mg/l)                       | 1140               | 500                                  | 2000                                  |
| (v) Calcium ( As Ca) (mg/l)                                        | 124                | 75                                   | 200                                   |
| (vi) Magnesium (As Mg) (mg/l)                                      | 58                 | 30                                   | 100                                   |
| (vii) Total Hardness(As CaCO <sub>3</sub> ) (mg/l)                 | 550                | 200                                  | 600                                   |
| (viii) Chlorides (As Cl) (mg/l)                                    | 260                | 250                                  | 1000                                  |
| (ix) Ammoniacal Nitrogen (as N) (mg/l)                             | 0.040              | -                                    | -                                     |
| (x) Albuminoid Nitrogen (as N) (mg/l)                              | 0.030              | -                                    | -                                     |
| (xi) Nitrous Nitrogen (As N) (mg/l)                                | Nil                | -                                    | -                                     |
| (xii) Oxygen absorbed (Tidy's 4 hours test)(mg/l)                  | 0.75               | -                                    | -                                     |
| (xiii) Hydrogen Ion Concentration (pH)                             | 7.2                | 6.5 TO 8.5                           | 6.5 TO 8.5                            |
| (xiv) Alkalinity to Phenolphthalein (AS CaCO <sub>3</sub> ) (mg/l) | Nil                | Nil                                  |                                       |
| (xv) Alkalinity to methyl orange (As CaCO <sub>3</sub> ) (mg/l)    | 320                | 200                                  | 600                                   |
| (xvi) Sulphates (As SO <sub>4</sub> ) (mg/l)                       | 420                | 200                                  | 400                                   |
| (xvii) Phosphates (as PO <sub>4</sub> ) (mg/l)                     | 0.010              | -                                    | -                                     |
| (xviii) Iron (As Fe) (mg/l)                                        | Trace              | 0.30                                 | 1.0                                   |
| (xix) Fluorides (as F) mg/l)                                       | 0.10               | 1.0                                  | 1.5                                   |
| (xx) Specific Conductance(micro Siemens/cm) at 25°C                | 1755               | -                                    | -                                     |

*[Signature]*  
WATER ANALYST

*[Signature]* 22/2/17  
CHIEF ANALYST

Figure 4.13 Study of Normal Water before Plasma Discharge

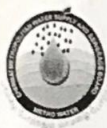

CHENNAI METROPOLITAN WATER SUPPLY AND SEWERAGE BOARD  
QUALITY ASSURANCE WING, WATER ANALYSIS LABORATORY  
NEW AVADI ROAD, CHENNAI - 600 010.

STUDY PURPOSE

1 Challan No. 823 Rs.525/- Date: 16.02.17  
2 Date of Collection 16.02.17  
3 Date of Receipt 16.02.17  
4 Source as per Lable Normal Wter (After treatment)  
5 Sample collected by Anand Institute of Higher Technology Kazhipattur, Chennai  
603 103.

6 RESULTS OF PHYSICAL AND CHEMICAL EXAMINATION

|                                                                       |                       | IS:10500-2012<br>ACCEPTABLE<br>LIMIT | IS:10500-2012<br>PERMISSIBLE<br>LIMIT |
|-----------------------------------------------------------------------|-----------------------|--------------------------------------|---------------------------------------|
| (i) Colour                                                            | Colourless &<br>Clear |                                      |                                       |
| (ii) Odour                                                            | Nil                   | Agreeable                            | Agreeable                             |
| (iii) Turbidity (N.T.U)                                               | 0.1                   | 1                                    | 10                                    |
| (iv) Total Dissolved Solids at 105 °C (mg/l)                          | 475                   | 500                                  | 2000                                  |
| (v) Calcium ( As Ca) (mg/l)                                           | 32                    | 75                                   | 200                                   |
| (vi) Magnesium (As Mg) (mg/l)                                         | 17                    | 30                                   | 100                                   |
| (vii) Total Hardness(As CaCO <sub>3</sub> ) (mg/l)                    | 148                   | 200                                  | 600                                   |
| (viii) Chlorides (As Cl) (mg/l)                                       | 144                   | 250                                  | 1000                                  |
| (ix) Ammoniacal Nitrogen (as N) (mg/l)                                | 0.040                 | -                                    | -                                     |
| (x) Albuminoid Nitrogen (as N) (mg/l)                                 | 0.040                 | -                                    | -                                     |
| (xi) Nitrous Nitrogen (As N) (mg/l)                                   | Nil                   | -                                    | -                                     |
| (xii) Oxygen absorbed (Tidy's 4 hours<br>test)(mg/l)                  | 0.45                  | -                                    | -                                     |
| (xiii) Hydrogen Ion Concentration (pH)                                | 6.5                   | 6.5 TO 8.5                           | 6.5 TO 8.5                            |
| (xiv) Alkalinity to Phenolphthalein (AS CaCO <sub>3</sub> )<br>(mg/l) | Nil                   | Nil                                  |                                       |
| (xv) Alkalinity to methyl orange (As CaCO <sub>3</sub> )<br>(mg/l)    | 60                    | 200                                  | 600                                   |
| (xvi) Sulphates (As SO <sub>4</sub> ) (mg/l)                          | 132                   | 200                                  | 400                                   |
| (xvii) Phosphates (as PO <sub>4</sub> ) (mg/l)                        | 0.010                 | -                                    | -                                     |
| (xviii) Iron (As Fe) (mg/l)                                           | Trace                 | 0.30                                 | 1.0                                   |
| (xix) Fluorides (as F) mg/l)                                          | 0.10                  | 1.0                                  | 1.5                                   |
| (xx) Specific Conductance(micro Siemens/cm)<br>at 25°C                | 730                   | -                                    | -                                     |

WATER ANALYST

CHIEF ANALYST

Figure 4.14 Study of Normal Water after Plasma Discharge

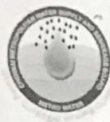

CHENNAI METROPOLITAN WATER SUPPLY AND SEWERAGE BOARD  
QUALITY ASSURANCE WING, WATER ANALYSIS LABORATORY  
NEW AVADI ROAD, CHENNAI - 600 010.

**STUDY PURPOSE**

- 1 Challan No. 799 Rs. 600/- Date: 10.02.17
- 2 Date of Collection 10.02.17
- 3 Date of Receipt 10.02.17
- 4 Source as per Lable Dye With Water (befour treatment)
- 5 Sample collected by Anand Institute of Higher Technology, OMR Rd., Kazhipattur, Chennai 603 103.

**6 RESULTS OF PHYSICAL AND CHEMICAL EXAMINATION**

|                                                                    |          | IS:10500-2012<br>ACCEPTABLE<br>LIMIT | IS:10500-2012<br>PERMISSIBLE<br>LIMIT |
|--------------------------------------------------------------------|----------|--------------------------------------|---------------------------------------|
| (i) Colour                                                         | Greenish |                                      |                                       |
| (ii) Odour                                                         | Earthy   | Agreeable                            | Agreeable                             |
| (iii) Turbidity (N.T.U)                                            | 69       | 1                                    | 10                                    |
| (iv) Total Dissolved Solids at 105 °C (mg/l)                       | 975      | 500                                  | 2000                                  |
| (v) Calcium ( As Ca) (mg/l)                                        | 92       | 75                                   | 200                                   |
| (vi) Magnesium (As Mg) (mg/l)                                      | 41       | 30                                   | 100                                   |
| (vii) Total Hardness(As CaCO <sub>3</sub> ) (mg/l)                 | 400      | 200                                  | 600                                   |
| (viii) Chlorides (As Cl) (mg/l)                                    | 330      | 250                                  | 1000                                  |
| (ix) Ammoniacal Nitrogen (as N) (mg/l)                             | 0.090    | -                                    | -                                     |
| (x) Albuminoid Nitrogen (as N) (mg/l)                              | 0.220    | -                                    | -                                     |
| (xi) Nitrous Nitrogen (As N) (mg/l)                                | Nil      | -                                    | -                                     |
| (xii) Oxygen absorbed (Tidy's 4 hours test)(mg/l)                  | 3.43     | -                                    | -                                     |
| (xiii) Hydrogen Ion Concentration (pH)                             | 8.6      | 6.5 TO 8.5                           | 6.5 TO 8.5                            |
| (xiv) Alkalinity to Phenolphthalein (AS CaCO <sub>3</sub> ) (mg/l) | 25       | Nil                                  |                                       |
| (xv) Alkalinity to methyl orange (As CaCO <sub>3</sub> ) (mg/l)    | 336      | 200                                  | 600                                   |
| (xvi) Sulphates (As SO <sub>4</sub> ) (mg/l)                       | 140      | 200                                  | 400                                   |
| (xvii) Phosphates (as PO <sub>4</sub> ) (mg/l)                     | 0.010    | -                                    | -                                     |
| (xviii) Iron (As Fe) (mg/l)                                        | 0.30     | 0.30                                 | 1.0                                   |
| (xix) Fluorides (as F) mg/l)                                       | 0.10     | 1.0                                  | 1.5                                   |
| (xx) Specific Conductance(micro Siemens/cm) at 25°C                | 1500     | -                                    | -                                     |

*A. V. Anand*  
WATER ANALYST

*A. V. Anand* 21.2.17  
CHIEF ANALYST

**Figure 4.15 Study of Dye with Water before Plasma Discharge**



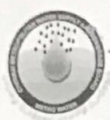

CHENNAI METROPOLITAN WATER SUPPLY AND SEWERAGE BOARD  
QUALITY ASSURANCE WING, WATER ANALYSIS LABORATORY  
NEW AVADI ROAD, CHENNAI - 600 010.

1 **Challan No. 799** **Rs.600/-** **STUDY PURPOSE**  
2 Date of Collection **Date:** 10.02.17  
3 Date of Receipt 10.02.17  
4 Source as per Lable 10.02.17  
Dye with Water (After treatment)  
5 Sample collected by Anand Institute of Higher Technology, OMR  
Rd., Kazhipattur, Chennai 603 103.

| 6 RESULTS OF PHYSICAL AND CHEMICAL EXAMINATION                     |                    | IS:10500-2012<br>ACCEPTABLE<br>LIMIT | IS:10500-2012<br>PERMISSIBLE<br>LIMIT |
|--------------------------------------------------------------------|--------------------|--------------------------------------|---------------------------------------|
| (i) Colour                                                         | Colourless & Clear |                                      |                                       |
| (ii) Odour                                                         | Nil                | Agreeable                            | Agreeable                             |
| (iii) Turbidity (N.T.U)                                            | 0.5                | 1                                    | 10                                    |
| (iv) Total Dissolved Solids at 105 °C (mg/l)                       | 975                | 500                                  | 2000                                  |
| (v) Calcium (As Ca) (mg/l)                                         | 96                 | 75                                   | 200                                   |
| (vi) Magnesium (As Mg) (mg/l)                                      | 70                 | 30                                   | 100                                   |
| (vii) Total Hardness(As CaCO <sub>3</sub> ) (mg/l)                 | 530                | 200                                  | 600                                   |
| (viii) Chlorides (As Cl) (mg/l)                                    | 200                | 250                                  | 1000                                  |
| (ix) Ammoniacal Nitrogen (as N) (mg/l)                             | 0.030              | -                                    | -                                     |
| (x) Albuminoid Nitrogen (as N) (mg/l)                              | 0.040              | -                                    | -                                     |
| (xi) Nitrous Nitrogen (As N) (mg/l)                                | Trace              | -                                    | -                                     |
| (xii) Oxygen absorbed (Tidy's 4 hours test)(mg/l)                  | 0.24               | -                                    | -                                     |
| (xiii) Hydrogen Ion Concentration (pH)                             | 7.5                | 6.5 TO 8.5                           | 6.5 TO 8.5                            |
| (xiv) Alkalinity to Phenolphthalein (AS CaCO <sub>3</sub> ) (mg/l) | Nil                | Nil                                  |                                       |
| (xv) Alkalinity to methyl orange (As CaCO <sub>3</sub> ) (mg/l)    | 200                | 200                                  | 600                                   |
| (xvi) Sulphates (As SO <sub>4</sub> ) (mg/l)                       | 190                | 200                                  | 400                                   |
| (xvii) Phosphates (as PO <sub>4</sub> ) (mg/l)                     | 0.010              | -                                    | -                                     |
| (xviii) Iron (As Fe) (mg/l)                                        | 0.20               | 0.30                                 | 1.0                                   |
| (xix) Fluorides (as F) mg/l)                                       | 0.10               | 1.0                                  | 1.5                                   |
| (xx) Specific Conductance(micro Siemens/cm) at 25°C                | 1500               | -                                    | -                                     |

WATER ANALYST

21.2.17  
CHIEF ANALYST

**Figure 4.16 Study of Dye with Water after Plasma Discharge**


**CHENNAI METROPOLITAN WATER SUPPLY AND SEWERAGE BOARD**  
 • QUALITY ASSURANCE WING, WATER ANALYSIS LABORATORY  
 NEW AVADI ROAD, CHENNAI - 600 010.

**STUDY PURPOSE**

|                       |                                                                              |       |          |
|-----------------------|------------------------------------------------------------------------------|-------|----------|
| 1 Challan No. 799     | Rs.600/-                                                                     | Date: | 10.02.17 |
| 2 Date of Collection  |                                                                              |       | 10.02.17 |
| 3 Date of Receipt     |                                                                              |       | 10.02.17 |
| 4 Source as per Lable | Humic acid water (before treatment)                                          |       |          |
| 5 Sample collected by | Anand Institute of Higher Technology, OMR Rd., Kazhipattur, Chennai 603 103. |       |          |

|                                                                    |                                      |                                       |
|--------------------------------------------------------------------|--------------------------------------|---------------------------------------|
| 6 RESULTS OF PHYSICAL AND CHEMICAL EXAMINATION                     | IS:10500-2012<br>ACCEPTABLE<br>LIMIT | IS:10500-2012<br>PERMISSIBLE<br>LIMIT |
| (i) Colour                                                         | Slightly Yellowish                   |                                       |
| (ii) Odour                                                         | Earthy                               | Agreeable                             |
| (iii) Turbidity (N.T.U)                                            | 35                                   | 1                                     |
| (iv) Total Dissolved Solids at 105 °C (mg/l)                       | 890                                  | 500                                   |
| (v) Calcium ( As Ca) (mg/l)                                        | 72                                   | 75                                    |
| (vi) Magnesium (As Mg) (mg/l)                                      | 53                                   | 30                                    |
| (vii) Total Hardness(As CaCO <sub>3</sub> ) (mg/l)                 | 400                                  | 200                                   |
| (viii) Chlorides (As Cl) (mg/l)                                    | 320                                  | 250                                   |
| (ix) Ammoniacal Nitrogen (as N) (mg/l)                             | 0.048                                | -                                     |
| (x) Albuminoid Nitrogen (as N) (mg/l)                              | 0.040                                | -                                     |
| (xi) Nitrous Nitrogen (As N) (mg/l)                                | Nil                                  | -                                     |
| (xii) Oxygen absorbed (Tidy's 4 hours test)(mg/l)                  | 2.92                                 | -                                     |
| (xiii) Hydrogen Ion Concentration (pH)                             | 8.6                                  | 6.5 TO 8.5                            |
| (xiv) Alkalinity to Phenolphthalein (AS CaCO <sub>3</sub> ) (mg/l) | 34                                   | Nil                                   |
| (xv) Alkalinity to methyl orange (As CaCO <sub>3</sub> ) (mg/l)    | 328                                  | 200                                   |
| (xvi) Sulphates (As SO <sub>4</sub> ) (mg/l)                       | 150                                  | 200                                   |
| (xvii) Phosphates (as PO <sub>4</sub> ) (mg/l)                     | 0.050                                | -                                     |
| (xviii) Iron (As Fe) (mg/l)                                        | 0.25                                 | 0.30                                  |
| (xix) Fluorides (as F) mg/l)                                       | 0.10                                 | 1.0                                   |
| (xx) Specific Conductance(micro Siemens/cm) at 25°C                | 1370                                 | -                                     |

  
 WATER ANALYST

  
 CHIEF ANALYST

**Figure 4.17 Study of Humic Acid with Water before Plasma Discharge**

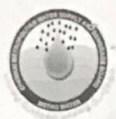

CHENNAI METROPOLITAN WATER SUPPLY AND SEWERAGE BOARD  
QUALITY ASSURANCE WING, WATER ANALYSIS LABORATORY  
NEW AVADI ROAD, CHENNAI - 600 010.

STUDY PURPOSE

- 1 Challan No. 799 Rs.600/- Date: 10.02.17  
2 Date of Collection 10.02.17  
3 Date of Receipt 10.02.17  
4 Source as per Lable Humic acid Water (After treatment) †  
5 Sample collected by Anand Institute of Higher Technology, OMR Rd., Kazhipattur, Chennai 603 103.

6 RESULTS OF PHYSICAL AND CHEMICAL EXAMINATION

|                                                                    |                    | IS:10500-2012<br>ACCEPTABLE<br>LIMIT | IS:10500-2012<br>PERMISSIBLE<br>LIMIT |
|--------------------------------------------------------------------|--------------------|--------------------------------------|---------------------------------------|
| (i) Colour                                                         | Colourless & Clear |                                      |                                       |
| (ii) Odour                                                         | Nil                | Agreeable                            | Agreeable                             |
| (iii) Turbidity (N.T.U)                                            | 0.4                | 1                                    | 10                                    |
| (iv) Total Dissolved Solids at 105 °C (mg/l)                       | 1220               | 500                                  | 2000                                  |
| (v) Calcium (As Ca) (mg/l)                                         | 220                | 75                                   | 200                                   |
| (vi) Magnesium (As Mg) (mg/l)                                      | 56                 | 30                                   | 100                                   |
| (vii) Total Hardness(As CaCO <sub>3</sub> ) (mg/l)                 | 780                | 200                                  | 600                                   |
| (viii) Chlorides (As Cl) (mg/l)                                    | 430                | 250                                  | 1000                                  |
| (ix) Ammoniacal Nitrogen (as N) (mg/l)                             | 0.030              | -                                    | -                                     |
| (x) Albuminoid Nitrogen (as N) (mg/l)                              | 0.030              | -                                    | -                                     |
| (xi) Nitrous Nitrogen (As N) (mg/l)                                | Trace              | -                                    | -                                     |
| (xii) Oxygen absorbed (Tidy's 4 hours test)(mg/l)                  | 0.30               | -                                    | -                                     |
| (xiii) Hydrogen Ion Concentration (pH)                             | 7.5                | 6.5 TO 8.5                           | 6.5 TO 8.5                            |
| (xiv) Alkalinity to Phenolphthalein (AS CaCO <sub>3</sub> ) (mg/l) | Nil                | Nil                                  |                                       |
| (xv) Alkalinity to methyl orange (As CaCO <sub>3</sub> ) (mg/l)    | 300                | 200                                  | 600                                   |
| (xvi) Sulphates (As SO <sub>4</sub> ) (mg/l)                       | 450                | 200                                  | 400                                   |
| (xvii) Phosphates (as PO <sub>4</sub> ) (mg/l)                     | 0.010              | -                                    | -                                     |
| (xviii) Iron (As Fe) (mg/l)                                        | 0.20               | 0.30                                 | 1.0                                   |
| (xix) Fluorides (as F) mg/l)                                       | 0.10               | 1.0                                  | 1.5                                   |
| (xx) Specific Conductance(micro Siemens/cm) at 25°C                | 1880               | -                                    | -                                     |

*[Signature]*  
WATER ANALYST

*[Signature]*  
21.2.12  
CHIEF ANALYST

Figure 4.18 Study of Humic Acid with Water after Plasma Discharge
