# Supplementary material for: Plasma Based Water Purifier: Design And Testing of&nbsp;Prototype with Different Samples of Water
Source: Preprints.org preprint supplement (doi:10.20944/preprints201809.0070.v1), 2018-09-04
Supplement: Supplementary file 3 [file supplementary]

Archive with 29 entries (23 files):
- auxilary/
- auxilary/result lab report.pdf
- __MACOSX/
- __MACOSX/auxilary/
- __MACOSX/auxilary/._result lab report.pdf
- auxilary/flow diagram.sdr
- __MACOSX/auxilary/._flow diagram.sdr
- auxilary/Videos/
- auxilary/Videos/04_plasma breakdown.mp4
- auxilary/flow diagram.jpeg
- __MACOSX/auxilary/._flow diagram.jpeg
- auxilary/simulation/
- auxilary/simulation/HIGH VOLTAGE CIRCUIT.asc
- __MACOSX/auxilary/simulation/
- __MACOSX/auxilary/simulation/._HIGH VOLTAGE CIRCUIT.asc
- auxilary/simulation/HIGH VOLTAGE CIRCUIT.log
- auxilary/simulation/INPUT.plt
- __MACOSX/auxilary/simulation/._INPUT.plt
- auxilary/simulation/OUTPUT.plt
- __MACOSX/auxilary/simulation/._OUTPUT.plt
- auxilary/simulation/HIGH VOLTAGE CIRCUIT.op.raw
- auxilary/simulation/HIGH VOLTAGE CIRCUIT.net
- auxilary/simulation/HIGH VOLTAGE CIRCUIT.raw
- auxilary/simulation/HIGH VOLTAGE CIRCUIT OUTPUT.plt
- __MACOSX/auxilary/simulation/._HIGH VOLTAGE CIRCUIT OUTPUT.plt
- auxilary/simulation/input.jpeg
- __MACOSX/auxilary/simulation/._input.jpeg
- auxilary/simulation/output.jpeg
- __MACOSX/auxilary/simulation/._output.jpeg
