# Supplementary material for: Plasma Based Water Purifier: Design And Testing of&nbsp;Prototype with Different Samples of Water
Source: Preprints.org preprint supplement (doi:10.20944/preprints201809.0070.v1), 2018-09-04
Supplement: Supplementary file 3 [file supplementary › auxilary/simulation/HIGH VOLTAGE CIRCUIT.asc]

Version 4
SHEET 1 1172 976
WIRE 512 112 272 112
WIRE 32 176 -32 176
WIRE 272 176 272 112
WIRE 512 176 512 112
WIRE 208 224 144 224
WIRE 512 272 512 256
WIRE 512 272 464 272
WIRE 272 288 272 272
WIRE 384 288 384 272
WIRE 384 288 272 288
WIRE 512 288 512 272
WIRE 32 304 32 176
WIRE 464 304 464 272
WIRE 464 304 32 304
WIRE 272 320 272 288
WIRE 880 320 624 320
WIRE 512 416 512 368
WIRE 512 416 384 416
WIRE 624 432 624 320
WIRE 272 448 272 416
WIRE 384 448 384 416
WIRE 384 448 272 448
WIRE 208 528 208 368
WIRE 512 528 208 528
WIRE 512 544 512 528
WIRE 512 656 512 624
WIRE 512 656 272 656
WIRE 624 672 624 512
WIRE 880 672 624 672
WIRE 512 688 512 656
WIRE 144 768 144 224
WIRE 512 768 144 768
WIRE 32 848 32 304
WIRE 144 848 32 848
WIRE 272 848 272 656
WIRE 272 848 208 848
WIRE 320 848 272 848
WIRE 432 848 384 848
WIRE 432 880 432 848
FLAG 432 880 0
FLAG 384 272 0
FLAG -112 176 0
FLAG 880 672 0
FLAG 880 320 OUTPUT
IOPIN 880 320 Out
FLAG 32 176 INPUT
IOPIN 32 176 In
SYMBOL npn 208 176 R0
SYMATTR InstName Q1
SYMATTR Value 2N5550
SYMBOL npn 208 320 R0
SYMATTR InstName Q2
SYMATTR Value 2N5550
SYMBOL ind2 496 160 R0
SYMATTR InstName L1
SYMATTR Value 200µ
SYMBOL ind2 496 272 R0
SYMATTR InstName L2
SYMATTR Value 200µ
SYMBOL ind2 496 528 R0
SYMATTR InstName L3
SYMATTR Value 32µ
SYMBOL ind2 496 672 R0
SYMATTR InstName L4
SYMATTR Value 32µ
SYMBOL res2 208 832 R90
WINDOW 0 0 32 VBottom 2
WINDOW 3 32 32 VTop 2
SYMATTR InstName R1
SYMATTR Value 110
SYMBOL res2 384 832 R90
WINDOW 0 0 32 VBottom 2
WINDOW 3 32 32 VTop 2
SYMATTR InstName R2
SYMATTR Value 27
SYMBOL ind2 640 528 R180
WINDOW 0 36 80 Left 2
WINDOW 3 36 40 Left 2
SYMATTR InstName L5
SYMATTR Value 400
SYMBOL voltage -16 176 R90
WINDOW 0 -32 56 VBottom 2
WINDOW 3 32 56 VTop 2
SYMATTR InstName V1
SYMATTR Value 24
TEXT 480 80 Left 2 !K1 L1 L2 L3 L4 L5 1
TEXT -136 960 Left 2 !.tran 0 1msec 0
TEXT 672 152 Left 2 ;FLY BACK TRANSFORMER
TEXT -232 248 Left 2 ;INPUT SUPPLY \nFROM LAPTOP CHARGER
TEXT 400 176 Left 2 ;5 TURNS
TEXT 392 328 Left 2 ;5 TURNS
TEXT 376 568 Left 2 ;2 TURNS
TEXT 376 696 Left 2 ;2 TURNS
RECTANGLE Normal 472 104 672 804 2
