# Supplementary material for: Plasma Based Water Purifier: Design And Testing of&nbsp;Prototype with Different Samples of Water
Source: Preprints.org preprint supplement (doi:10.20944/preprints201809.0070.v1), 2018-09-04
Supplement: Supplementary file 3 [file supplementary › auxilary/simulation/HIGH VOLTAGE CIRCUIT.log]

Circuit: * /Users/apple/Documents/LTspice/HIGH VOLTAGE CIRCUIT.asc

WARNING: Less than two connections to node OUTPUT.  This node is used by L5.
Direct Newton iteration for .op point succeeded.

Date: Sun Sep  2 20:13:29 2018
Total elapsed time: 0.140 seconds.

tnom = 27
temp = 27
method = modified trap
totiter = 10895
traniter = 10885
tranpoints = 3145
accept = 2453
rejected = 692
matrix size = 17
fillins = 32
solver = Normal
Matrix Compiler1: 4084 object code size  1.0/0.6/[0.3]
Matrix Compiler2:     167 opcodes
