# Supplementary material for: Plasma Based Water Purifier: Design And Testing of&nbsp;Prototype with Different Samples of Water
Source: Preprints.org preprint supplement (doi:10.20944/preprints201809.0070.v1), 2018-09-04
Supplement: Supplementary file 3 [file supplementary › auxilary/simulation/HIGH VOLTAGE CIRCUIT.net]

* /Users/apple/Documents/LTspice/HIGH VOLTAGE CIRCUIT.asc
Q1 N001 N002 0 0 2N5550
Q2 0 N004 N003 0 2N5550
L1 N001 INPUT 200µ
L2 INPUT N003 200µ
L3 N004 N005 32µ
L4 N005 N002 32µ
R1 N005 INPUT 110
R2 0 N005 27
L5 0 OUTPUT 400
V1 INPUT 0 24
.model NPN NPN
.model PNP PNP
.lib /Users/apple/Library/Application Support/LTspice/lib/cmp/standard.bjt
K1 L1 L2 L3 L4 L5 1
.tran 0 1msec 0
* FLY BACK TRANSFORMER
* INPUT SUPPLY \nFROM LAPTOP CHARGER
* 5 TURNS
* 5 TURNS
* 2 TURNS
* 2 TURNS
.backanno
.end
