# Supplementary material for: Plasma Based Water Purifier: Design And Testing of&nbsp;Prototype with Different Samples of Water
Source: Preprints.org preprint supplement (doi:10.20944/preprints201809.0070.v1), 2018-09-04
Supplement: Supplementary file 3 [file supplementary › auxilary/simulation/OUTPUT.plt]

[Transient Analysis]
{
   Npanes: 1
   {
      traces: 1 {268959746,0,"V(output)"}
      X: ('m',1,0,0.0001,0.001)
      Y[0]: ('K',0,-63000,9000,36000)
      Y[1]: ('_',0,1e+308,0,-1e+308)
      Volts: ('K',0,0,0,-63000,9000,36000)
      Log: 0 0 0
      NeyeDiagPeriods: 0
   }
}
