# Supplementary figures and images for: Plasma Based Water Purifier: Design And Testing of&nbsp;Prototype with Different Samples of Water
Source: Preprints.org preprint supplement (doi:10.20944/preprints201809.0070.v1), 2018-09-04

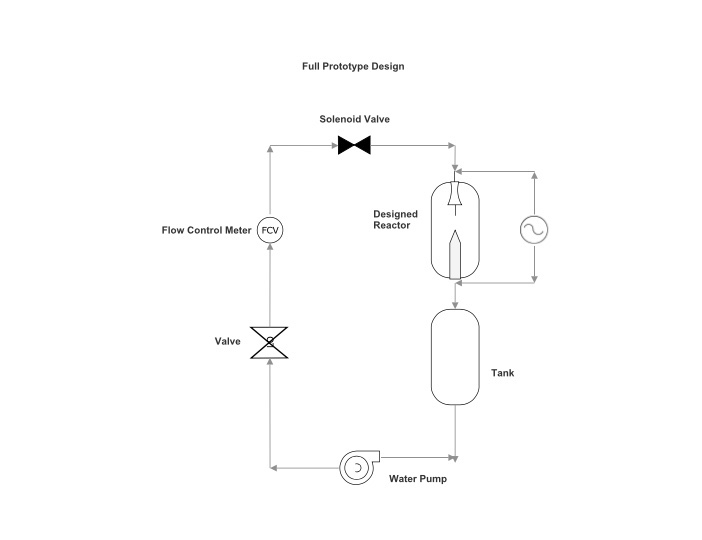

Supplement: Supplementary file 3 [file supplementary › auxilary/flow diagram.jpeg]

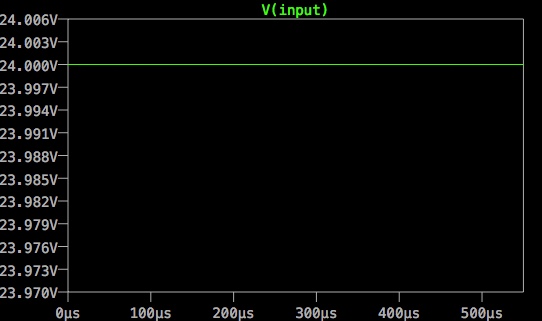

Supplement: Supplementary file 3 [file supplementary › auxilary/simulation/input.jpeg]

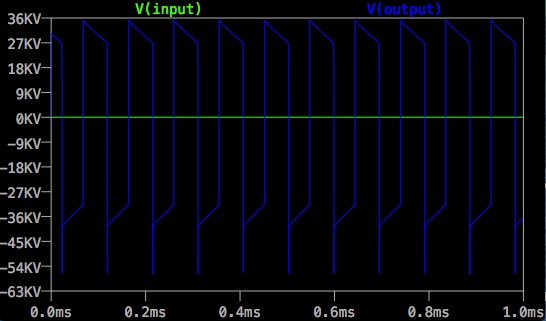

Supplement: Supplementary file 3 [file supplementary › auxilary/simulation/output.jpeg]
